# Supplementary material
Source: PubMed Central journal article supplement (PMC7156126)
Supplement: NIHMS1578007-supplement-1.pdf [file NIHMS1578007-supplement-1.pdf]

1 **Supplemental Data**

2 Supplemental Table 1: Potential Asn crosslinked peptides identified in human lenses

| Peptide A                                         | Peptide B                          | [MH] <sup>+</sup> exp | [MH] <sup>+</sup> cal | error in ppm |
|---------------------------------------------------|------------------------------------|-----------------------|-----------------------|--------------|
| βB1 (Asn 162) or<br>βB2(Asp 170): <u>GN</u> *     | Filensin (Lys 451): E <u>K</u> *VR | 703.3737              | 703.3733              | 0.58         |
| βB1 (Asn 162) or<br>βB2 (Asp 170):<br><u>GN</u> * | Filensin (Lys 447): <u>K</u> *VK   | 546.3252              | 546.3246              | 1            |
| βB1 (Asn 162) or<br>βB2 (Asp 170):<br><u>GN</u> * | αB (Lys 121): <u>K</u> *YR         | 638.3259              | 638.3257              | 0.36         |

3 \* Asterisks indicate the residues that are involved in crosslinking. All masses listed are  
4 monoisotopic masses.

5

6

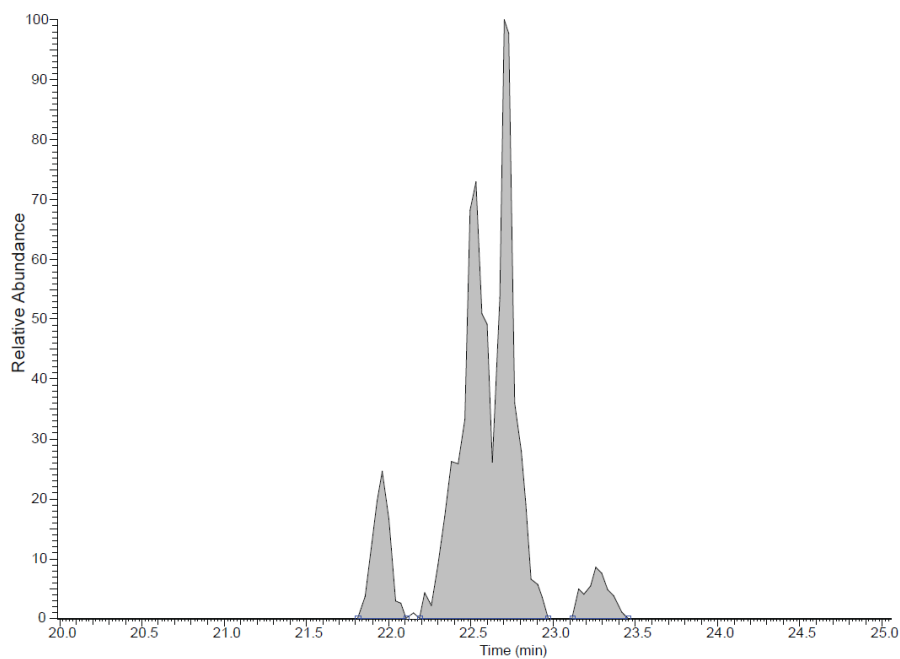

7

8 **Supplemental Figure 1)** Selected Ion Chromatogram for AQP0 227-233 crosslinked to  
9 AQP0 239-246, m/z 534.6213±10ppm, Charge 3+

10

11

12

13

14

15

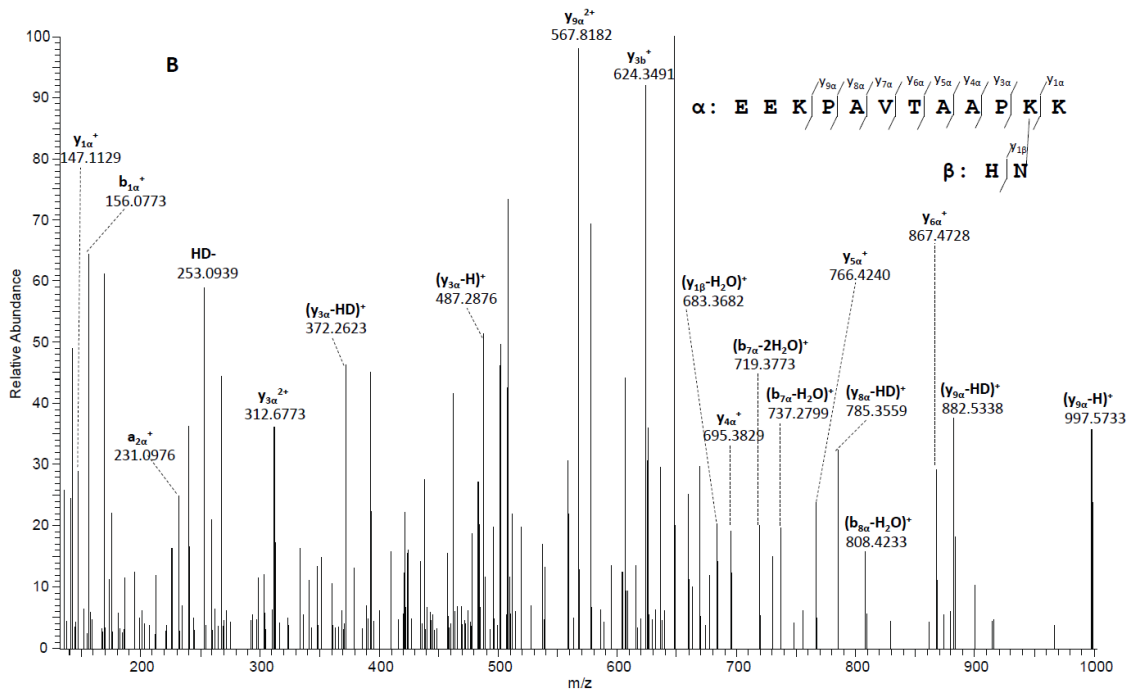

16

17 **Supplemental Figure 2)** MS/MS spectrum of a crosslinked peptide detected in the tryptic  
 18 digest of human lens proteins. The crosslink involves Asn 101 from  $\alpha$ A crystallin and Lys  
 19 174 from  $\alpha$ B crystallin.

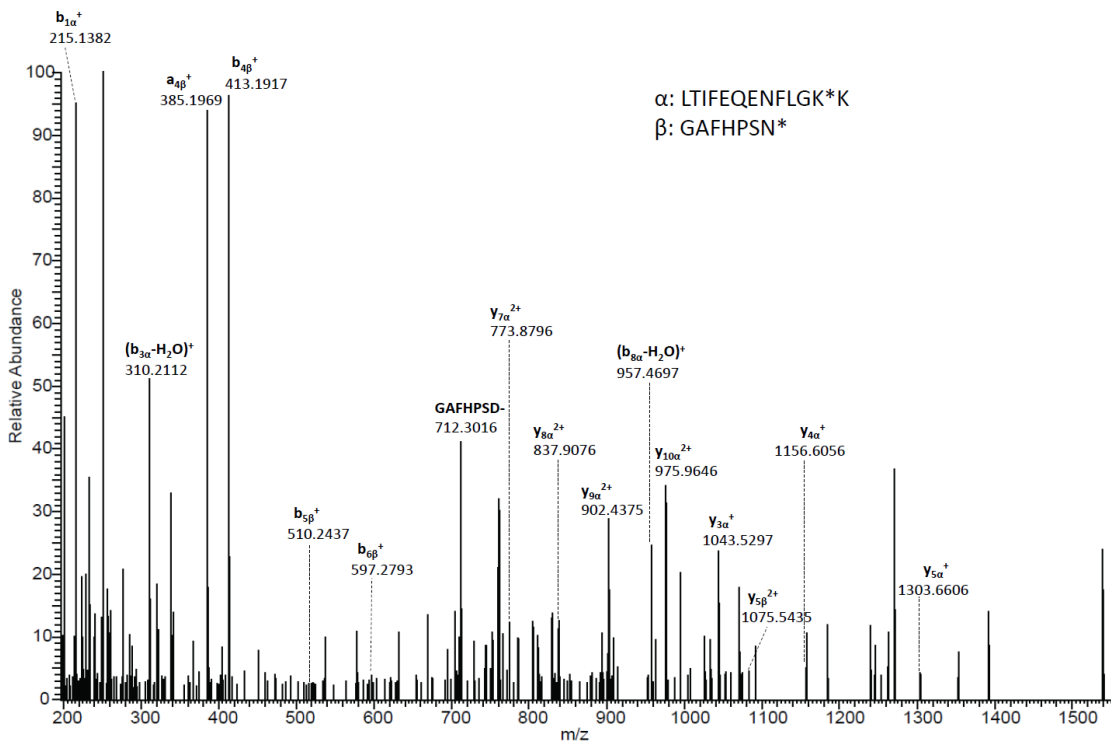

20

21 **Supplemental Figure 3)** MS/MS spectrum of a crosslinked peptide detected in the tryptic  
 22 digest of human lens proteins. The crosslink involves Asn 205 from  $\beta$ B2 crystallin and Lys  
 23 118 from  $\beta$ A4 crystallin.

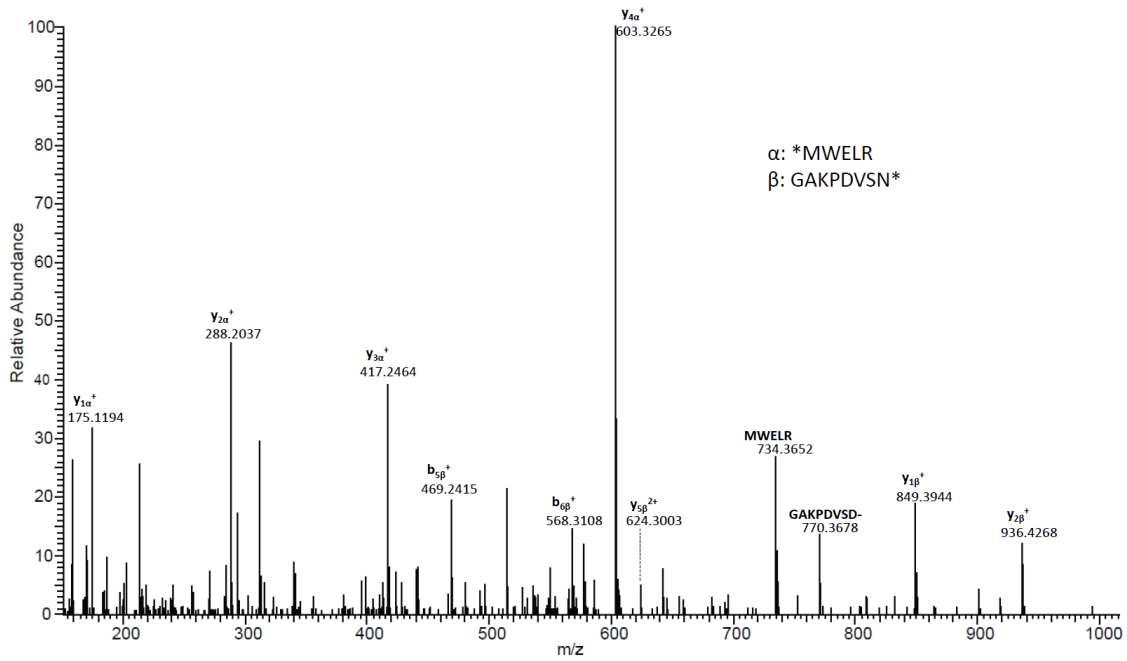

24

25 **Supplemental Figure 4)** MS/MS spectrum of a crosslinked peptide detected in the tryptic  
 26 digest of human lens proteins. The crosslink involves Asn 246 from AQP0 and the N-  
 27 terminus of Met 1 from AQP0.

28

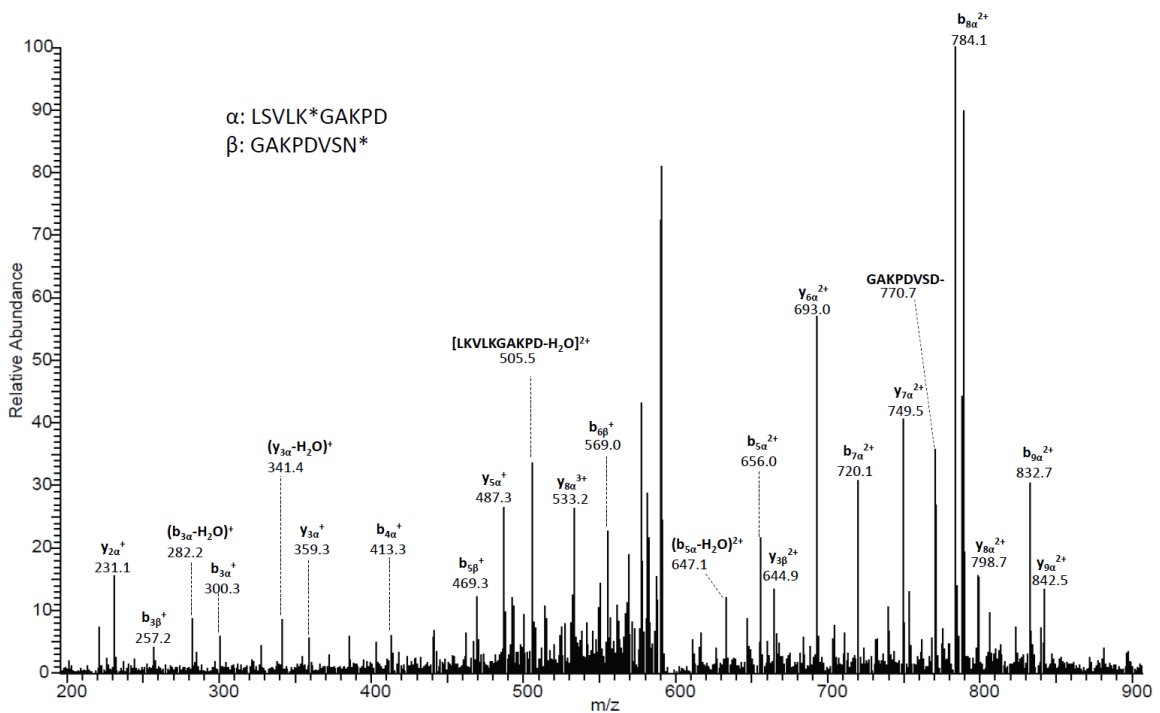

29

30 **Supplemental Figure 5)** MS/MS spectrum of a crosslinked peptide detected in the tryptic  
 31 digest of human lens proteins. The crosslink involves Asn 246 from AQP0 and Lys 238 from  
 32 AQP0.

33

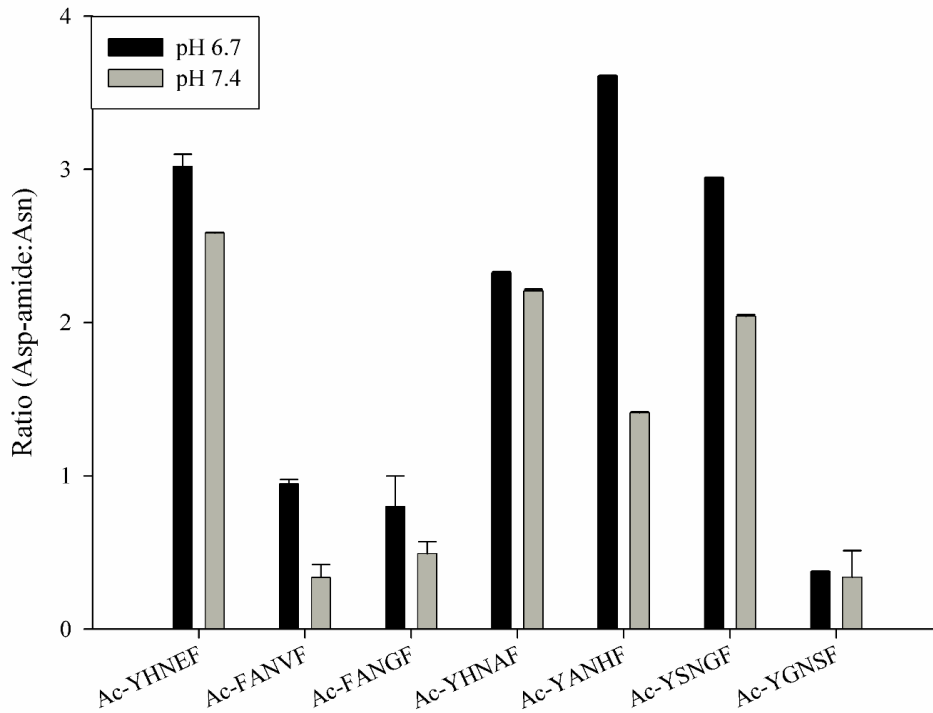

34

35 **Supplemental Figure 6)** Ratio of C-terminal Asp-amide to Asn formed from original peptide  
 36 at pH 6.7 and 7.4. Peptides incubated for 4 days at 60°C. Values are n=3 +/- SD.

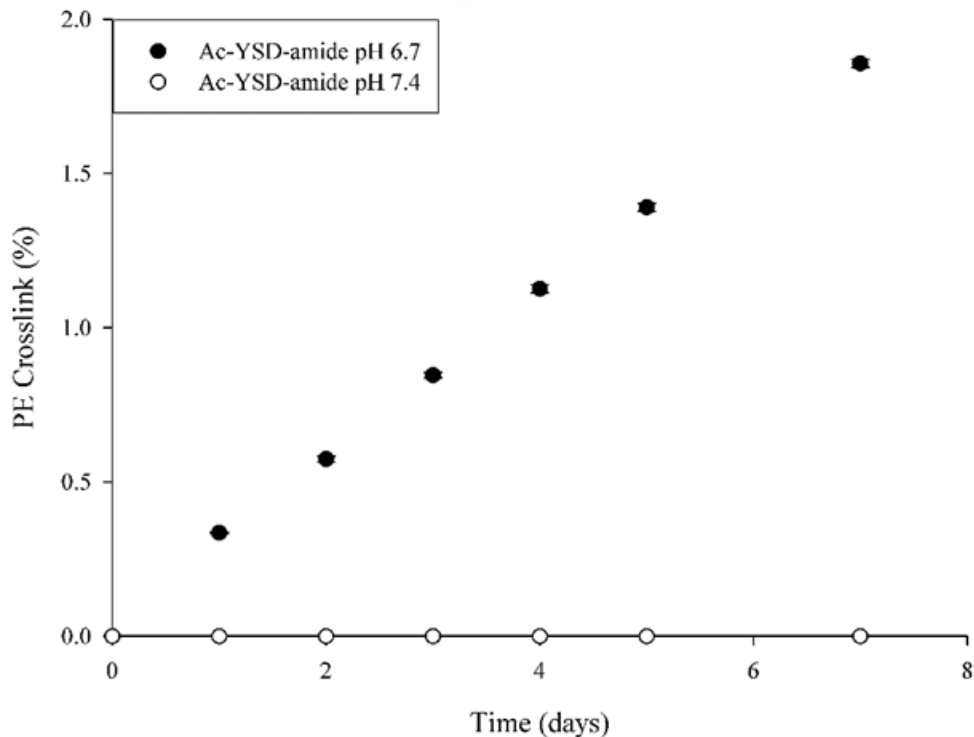

37

38 **Supplemental Figure 7) Ac-YSD-amide readily forms a crosslink with PE.** Crosslink  
 39 formation following incubation at 60 °C of a) Ac-YHD-amide and Ac-YHN b) Ac-YSD-  
 40 amide with PE at pH 6.7 and 7.4. Ac-YSN did not form a detectable PE crosslink under these  
 41 conditions.

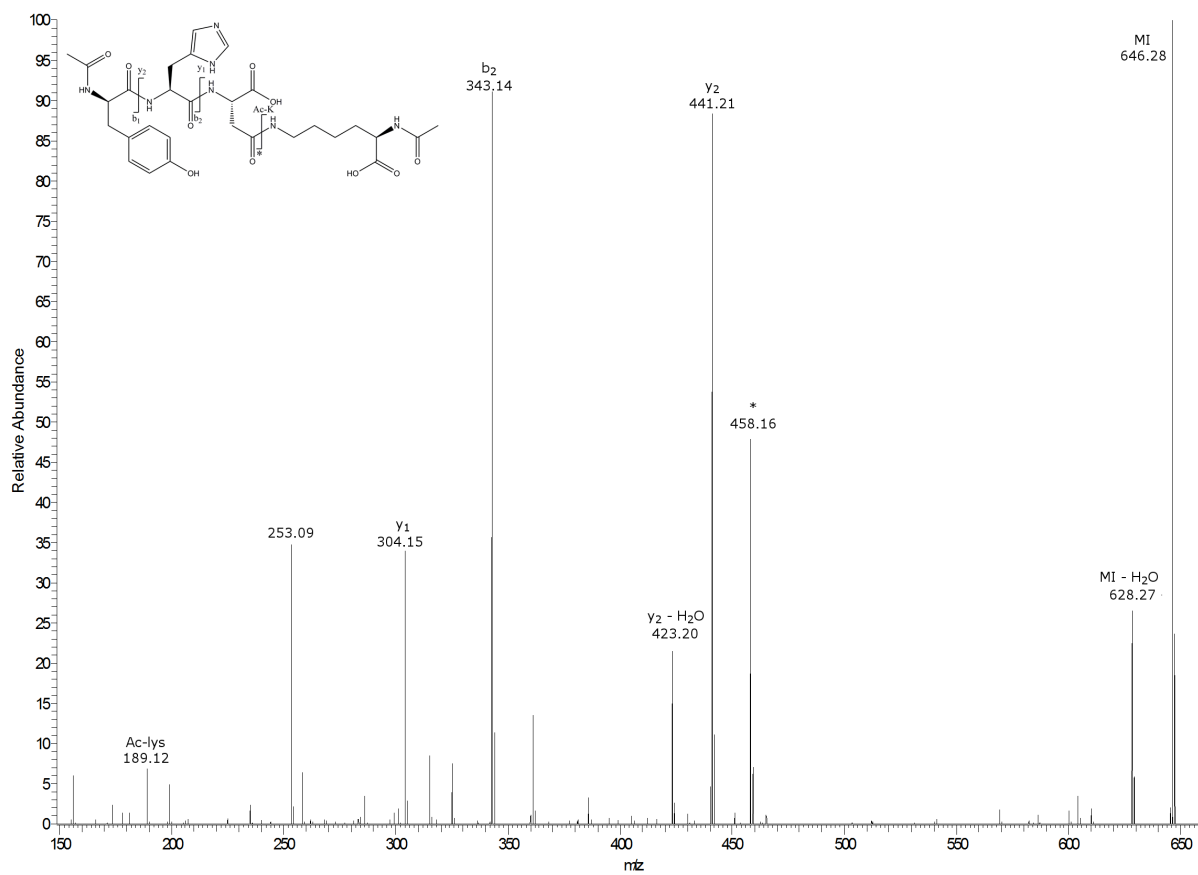

42

43 **Supplemental Figure 8). Ac-YHD crosslink with Ac-K.** MS/MS spectrum of the Ac-YHD  
 44 Ac-K crosslink from an incubation of Ac-YHD-amide with 5 molar excess of Ac-K at pH 6.7  
 45 for 3 days at 60°C. \* = loss of Ac-K, MI = molecular ion.

46

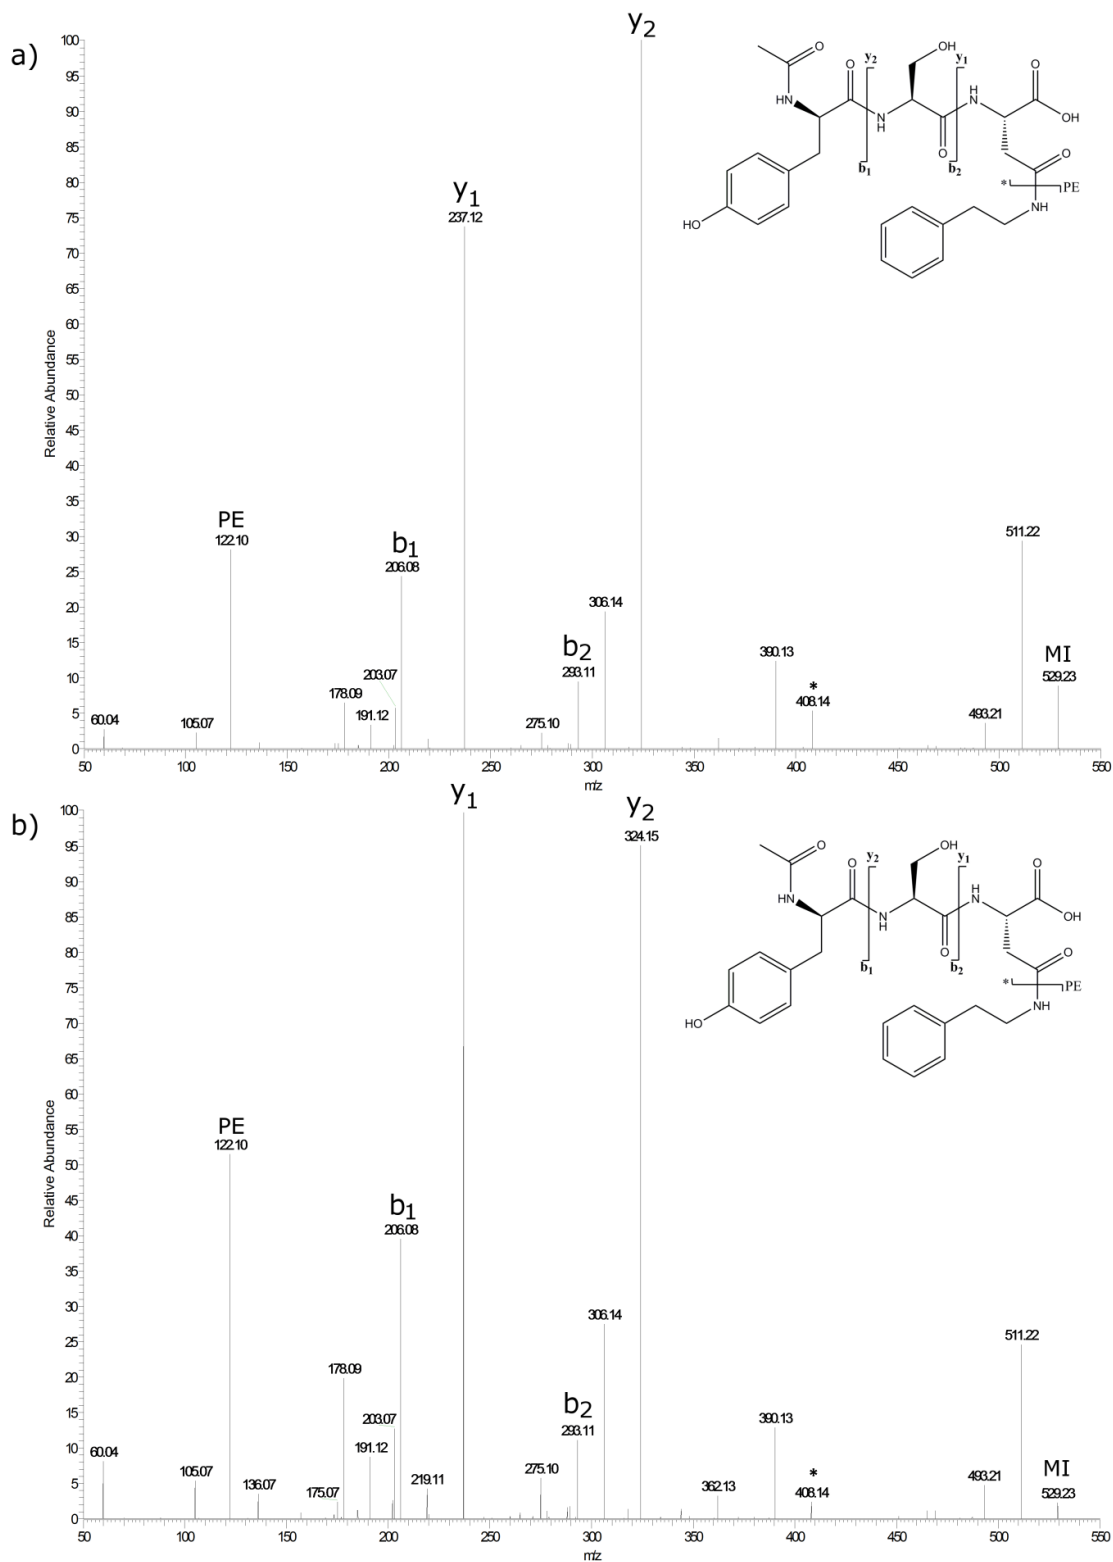

47

48 **Supplemental Figure 9). Ac-YSD crosslink with PE forms from Ac-YSD-amide via an**  
 49 **anhydride.** a) MS/MS spectrum of the Ac-YSD PE crosslink isolated by HPLC from  
 50 incubation of Ac-YSD-amide with PE at pH 6.7 for 3 days at 60°C. b) MS/MS spectrum of  
 51 the Ac-YSD PE crosslink formed by reacting Ac-YH succinic anhydride with PE. \* = loss of  
 52 PE, MI = molecular ion.

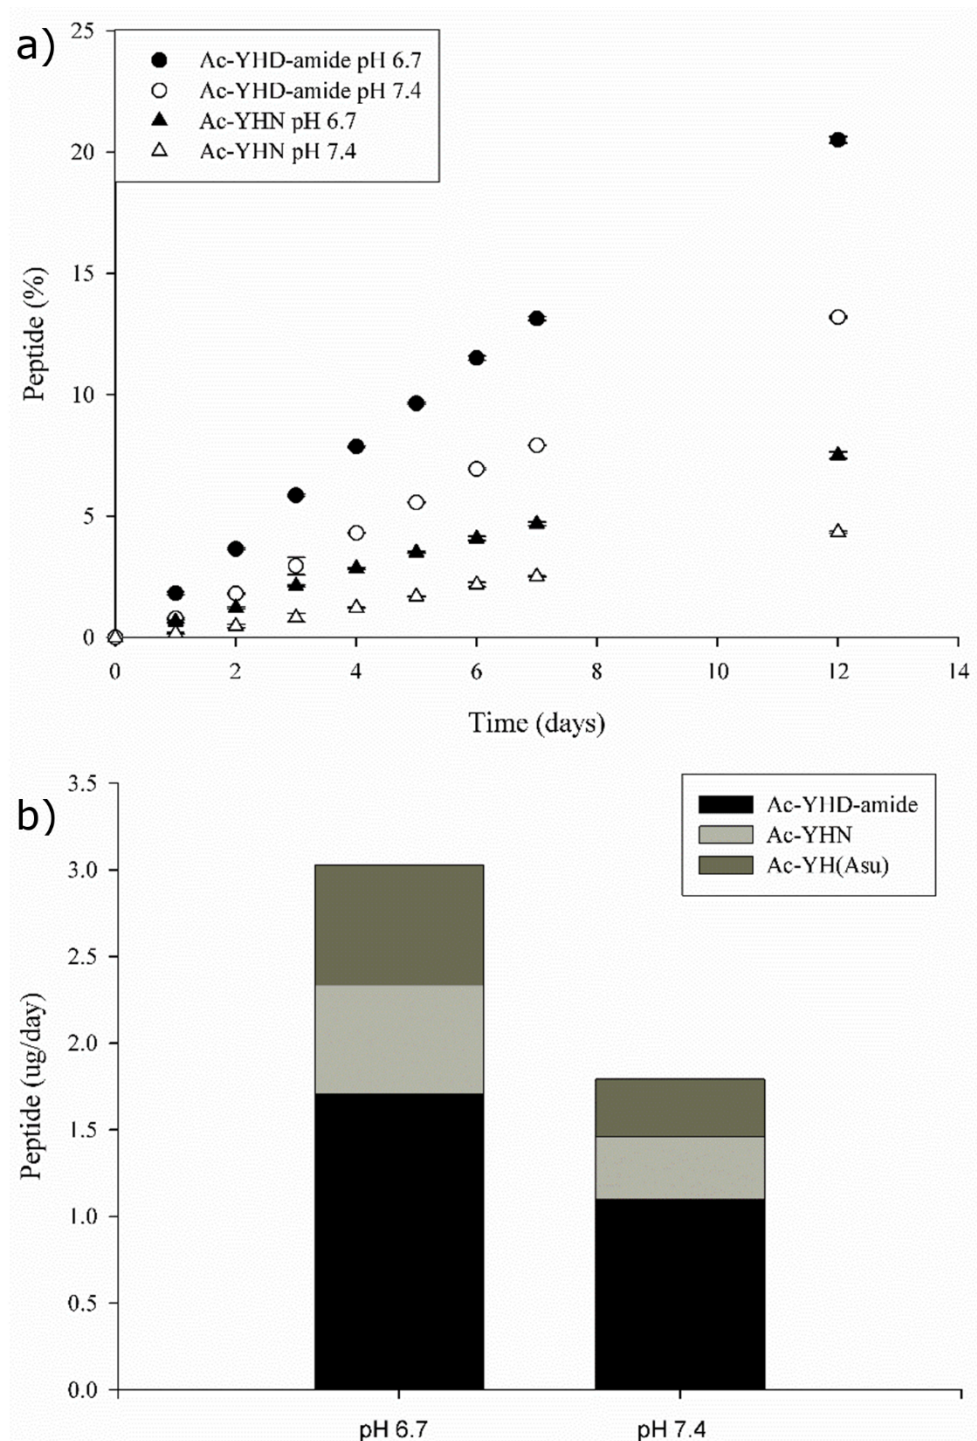

53

54 **Supplemental Figure 10) Decomposition of Ac-YHNPF at pH 6.7 and 7.4.** a) Time course  
 55 of Ac-YHNPF breakdown products Ac-YHD-amide and Ac-YHN. Ac-YHNPF was  
 56 incubated at 60°C in 100mM phosphate buffer, pH 6.7 and pH 7.4. Peaks corresponding to  
 57 Ac-YHD-amide and Ac-YHN were identified by co-elution with synthetic peptide standards  
 58 and MS/MS. Peak areas were determined at 280nm by comparison to that of the original  
 59 peptide.

60 b) Comparison of three Asn breakdown product observed at pH 6.7 and 7.4 as a function of  
 61 the rate of formation.

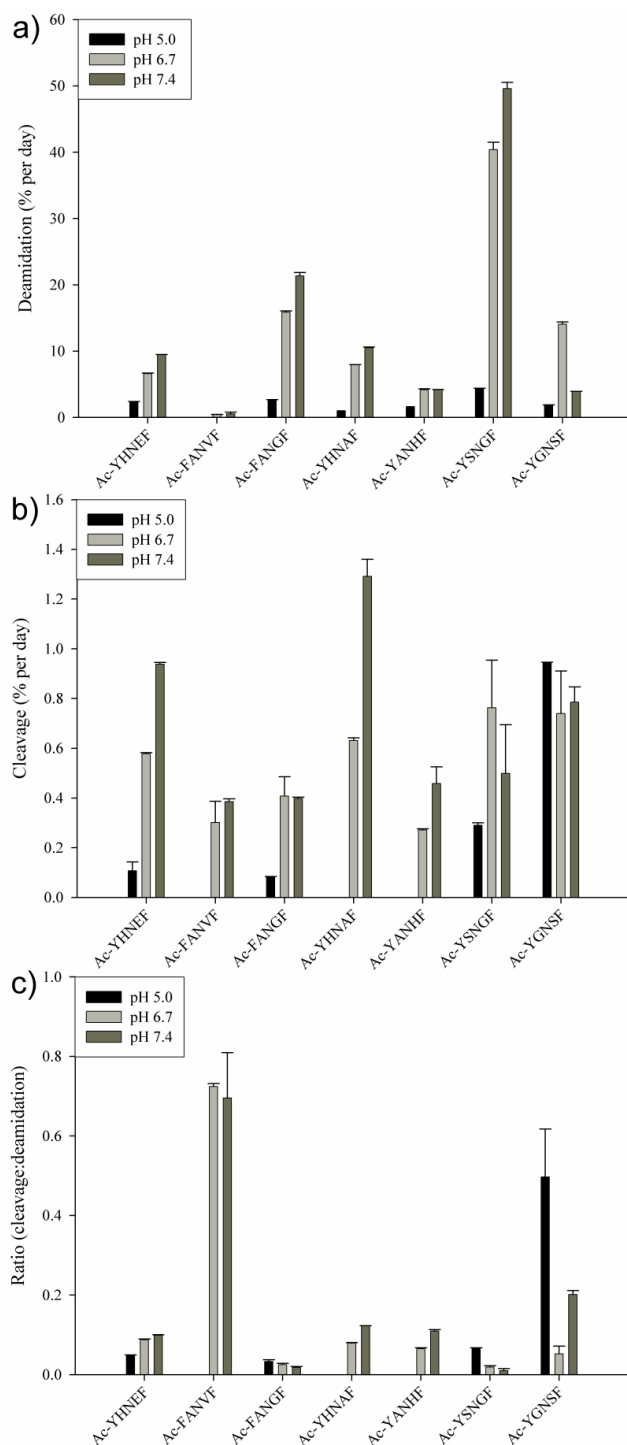

63

64 **Supplemental Figure 11) The effect of amino acid sequence on Asn deamidation and**  
 65 **cleavage at Asn.**

66 a) Deamidation of peptides at pH 5.0, 6.7 and 7.4. Deamidation rate was calculated as  
 67 for Fig 3, b) Cleavage of the same peptides at pH 5.0, 6.7 and 7.4. c) The ratio of  
 68 cleavage to deamidation for each peptide after seven days. All experiments were  
 69 conducted at 60°C.



70

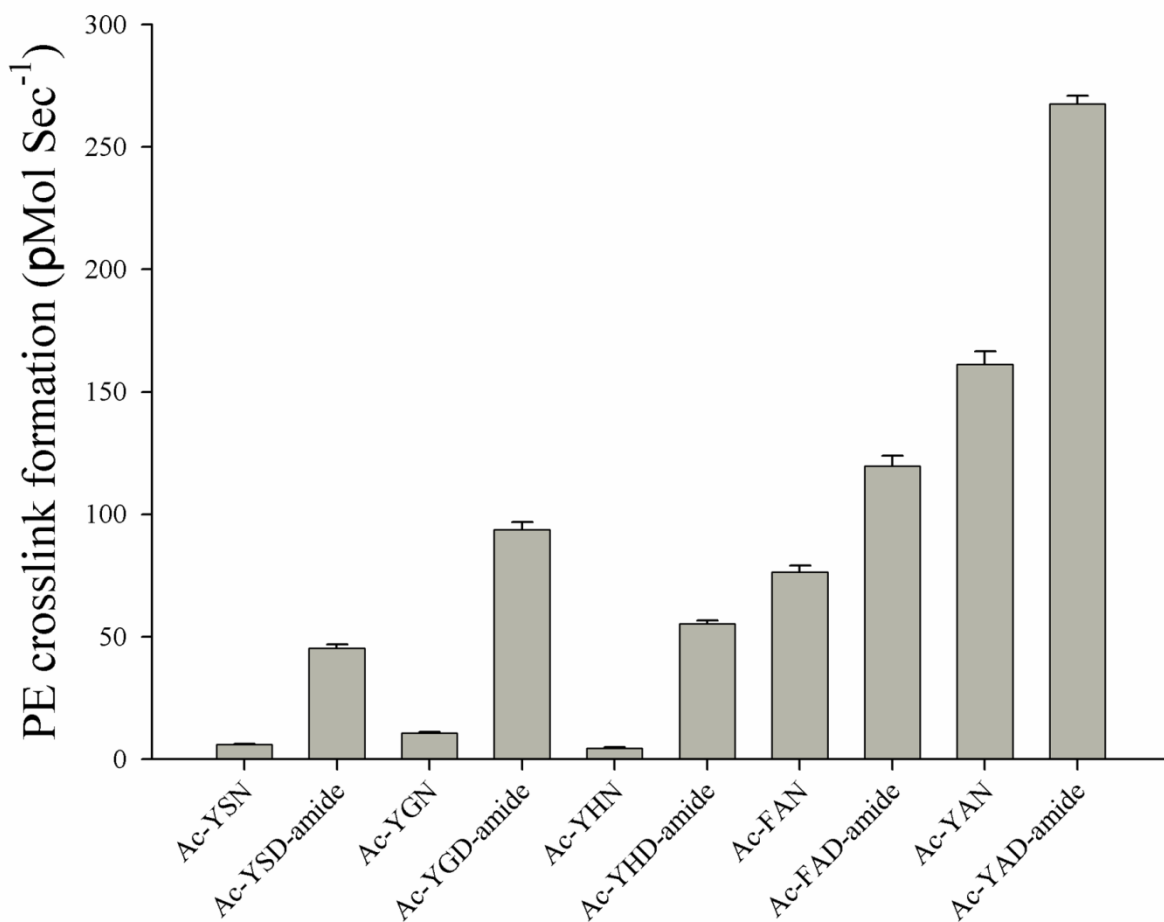

71

72 **Supplemental Figure 12)** The rate of PE crosslink formation of when a 5 fold molar excess  
73 of PE was incubated with either a C-terminal Asn or Asp-amide. Incubations in 80%  
74 acetonitrile.

75

76

77

78
